# Supplementary material
Source: Royal Society of Chemistry journal article supplement (doi:10.1039/d6dt00964f)
Supplement: d6dt00964f1.pdf [file d6dt00964f1.pdf]

# Triphenylene Chromophore Enhances Emission in Au/Cu Heterometallic Complexes

Jalal Ahmad<sup>a</sup>, Anyie P. Atencio<sup>a</sup>, Jas S. Ward,<sup>b</sup> Marianne Engeser,<sup>c</sup> Kari Rissanen,<sup>b</sup> Inmaculada Angurell<sup>a</sup>  
and Laura Rodríguez<sup>a,\*</sup>

<sup>a</sup> *Departament de Química Inorgànica i Orgànica, Secció de Química Inorgànica, Universitat de Barcelona and Institut de Nanociència i Nanotecnologia (IN2UB). Martí i Franquès 1-11, E-08028 Barcelona, Spain. e-mail: [laurarodriguezr@ub.edu](mailto:laurarodriguezr@ub.edu)*

<sup>b</sup> *University of Jyväskylä, Department of Chemistry, 40014 Jyväskylä, Finland.*

<sup>c</sup> *Kekulé-Institut für Organische Chemie und Biochemie der Universität, Gerhard-Domagk-Strasse 1, D-53121 Bonn, Germany.*

## Supporting Information

|                                                                                                 |          |
|-------------------------------------------------------------------------------------------------|----------|
| Scheme of the synthesis of 2-ethynyltriphenylene ligand .....                                   | page S2  |
| Synthesis of gold (I) precursor.....                                                            | page S2  |
| NMR, IR and mass spectra of the compounds.....                                                  | page S3  |
| X-ray crystallography packing of the compounds [Au(L)(PPyPh <sub>2</sub> )], Cu1a and Cu1b..... | page S17 |
| Absorption and emission spectra of the compounds .....                                          | page S19 |
| Crystallographic data .....                                                                     | page S21 |
| Emission lifetimes and quantum yields in different media.....                                   | page S23 |

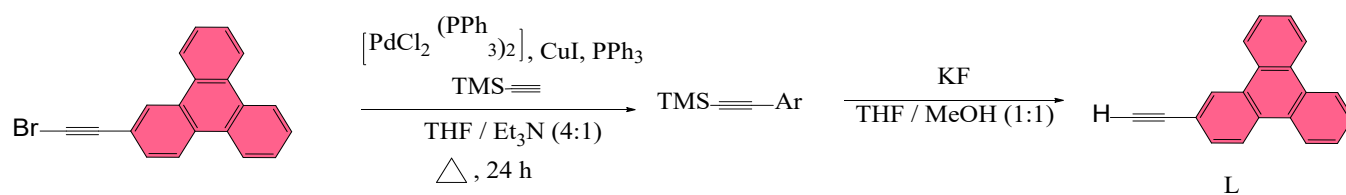

**Scheme S1.** Synthesis of 2-ethynyltriphenylene ligand (L).

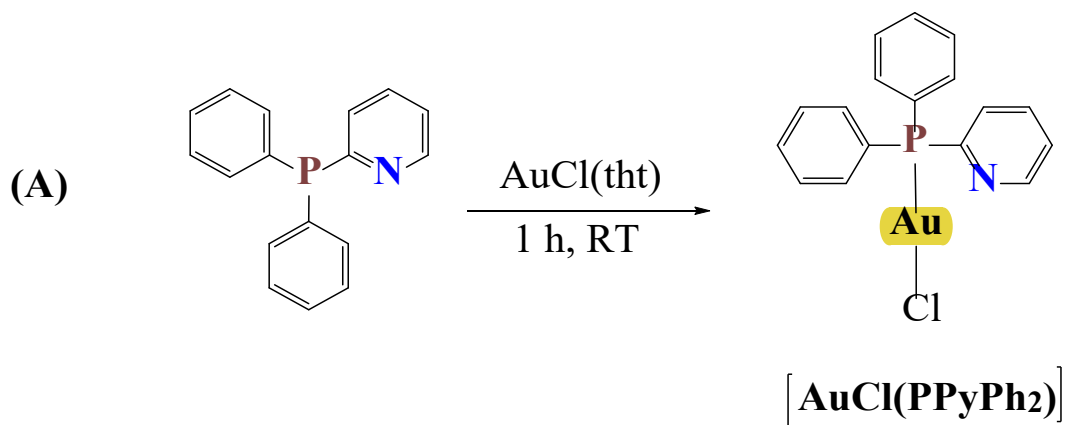

**Scheme S2.** Synthesis of gold (I) precursor.

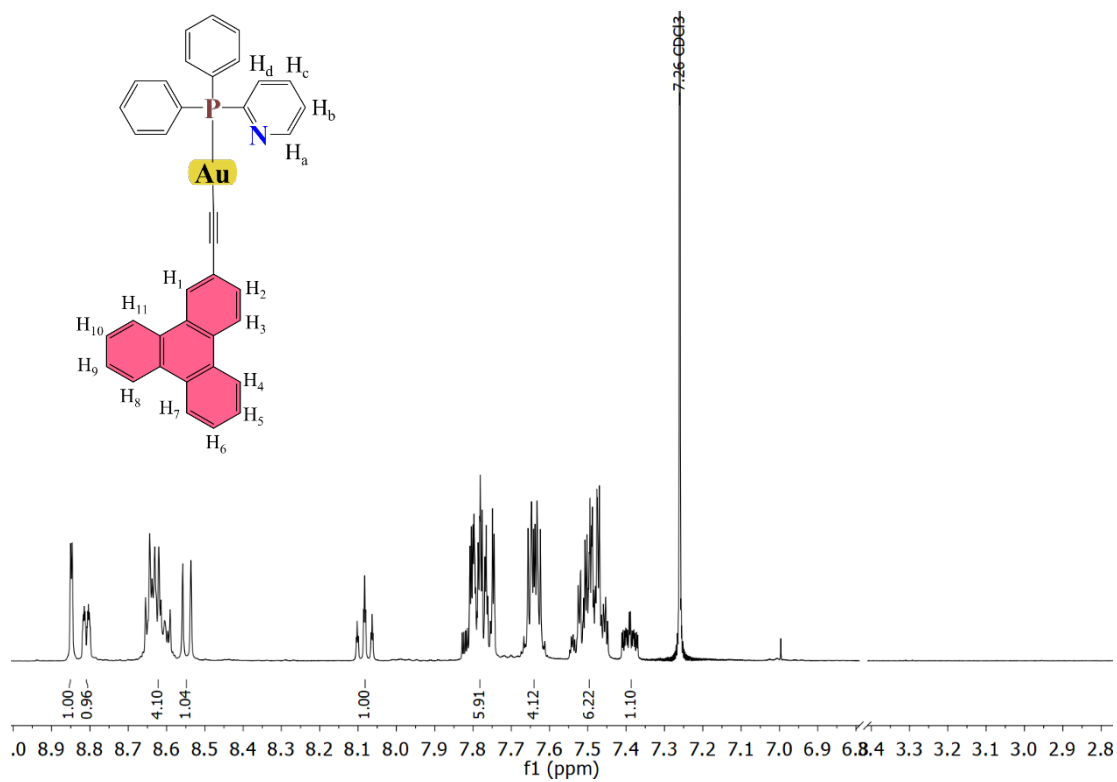

**Figure S1.**  $^1\text{H-NMR}$  spectra of  $[\text{Au}(\text{L})(\text{PPyPh}_2)]$  in  $\text{CDCl}_3$ .

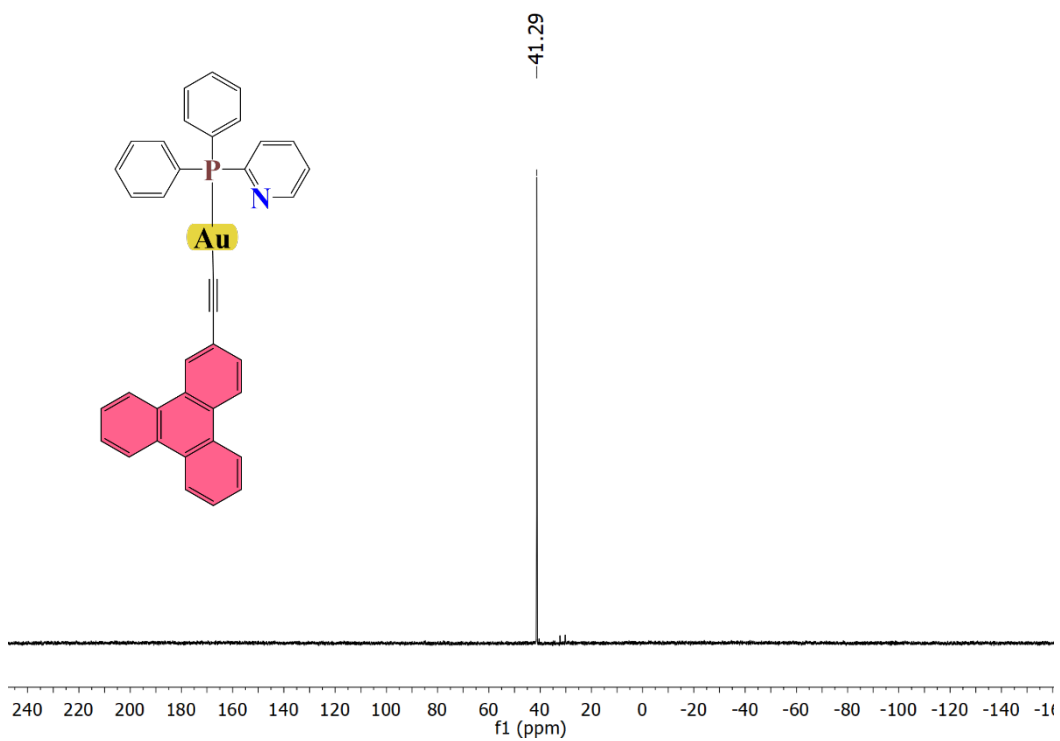

**Figure S2.**  $^{31}\text{P-NMR}$  spectra of  $[\text{Au}(\text{L})(\text{PPyPh}_2)]$  in  $\text{CDCl}_3$ .

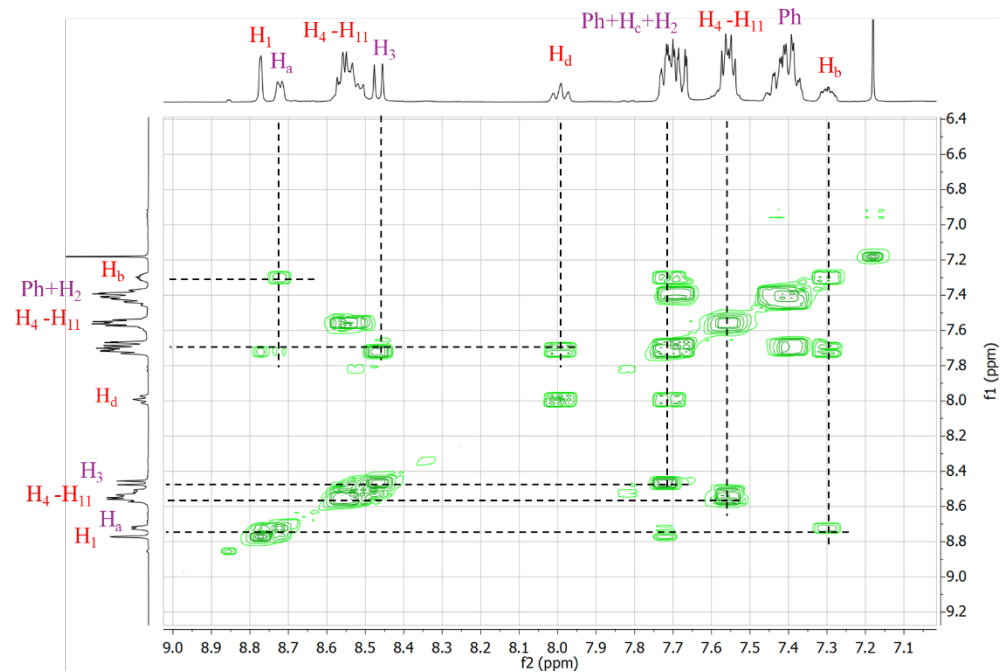

**Figure S3.**  $^1\text{H}$ - $^1\text{H}$  COSY NMR of the complex  $[\text{Au}(\text{L})(\text{PPyPh}_2)]$  in  $\text{CDCl}_3$ .

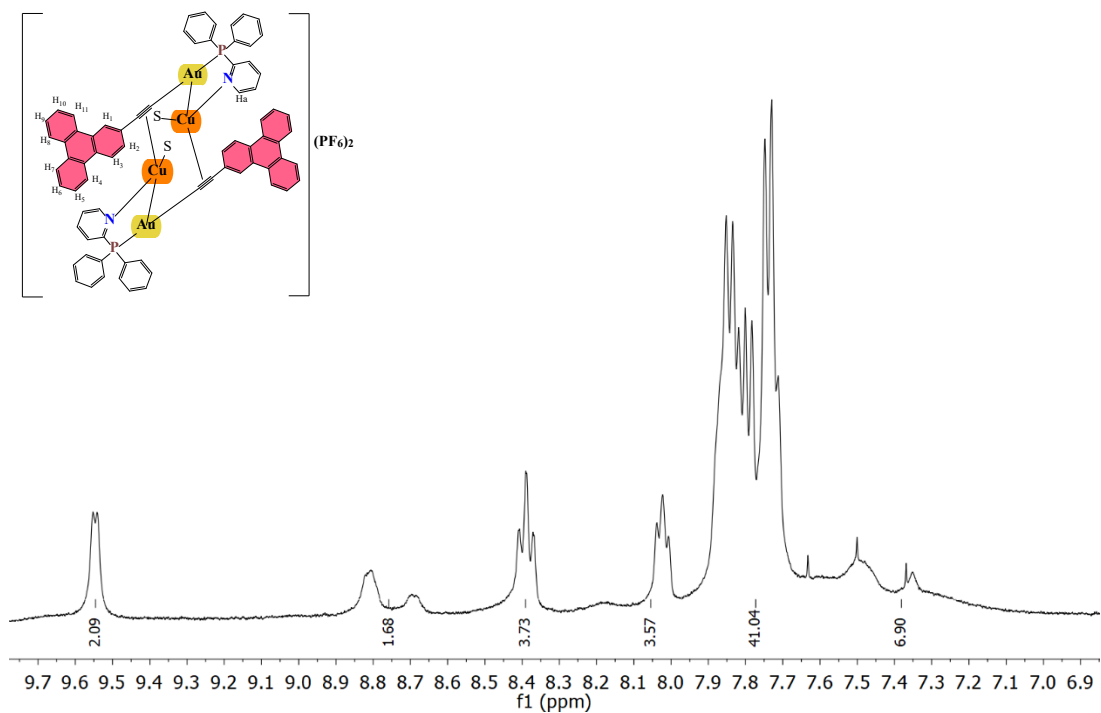

**Figure S4.**  $^1\text{H}$ -NMR spectra of **Cu1a** in  $\text{CD}_3\text{COCD}_3$ .

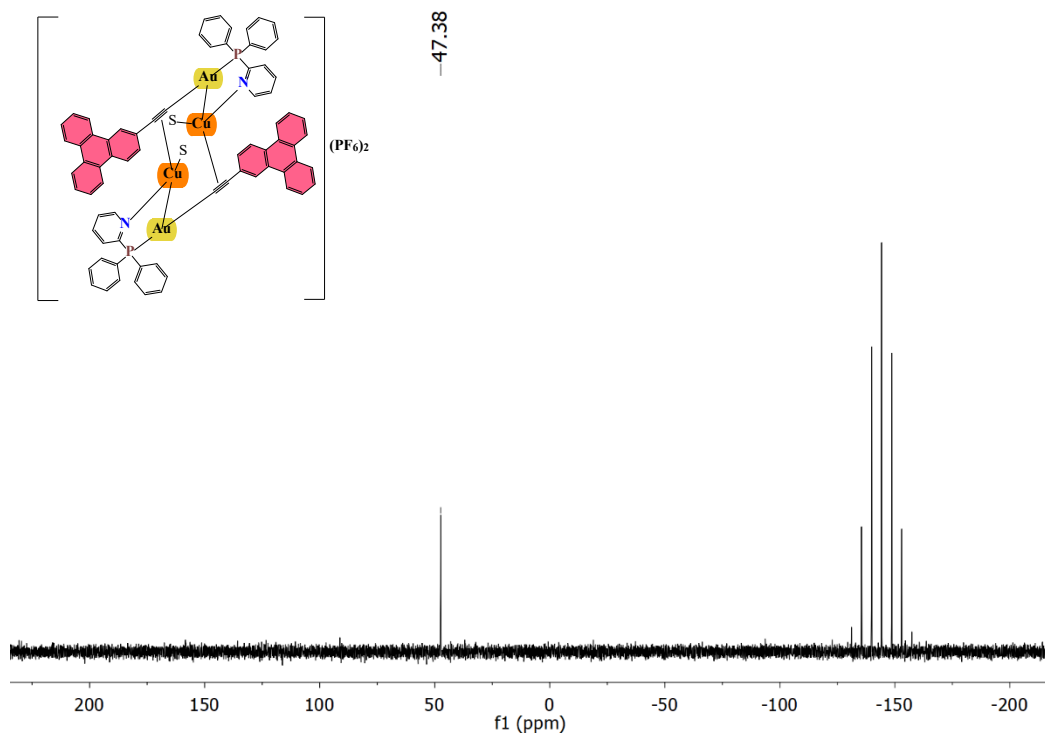

**Figure S5.**  $^{31}P$ -NMR spectra of **Cu1a** in  $CD_3COCD_3$ .

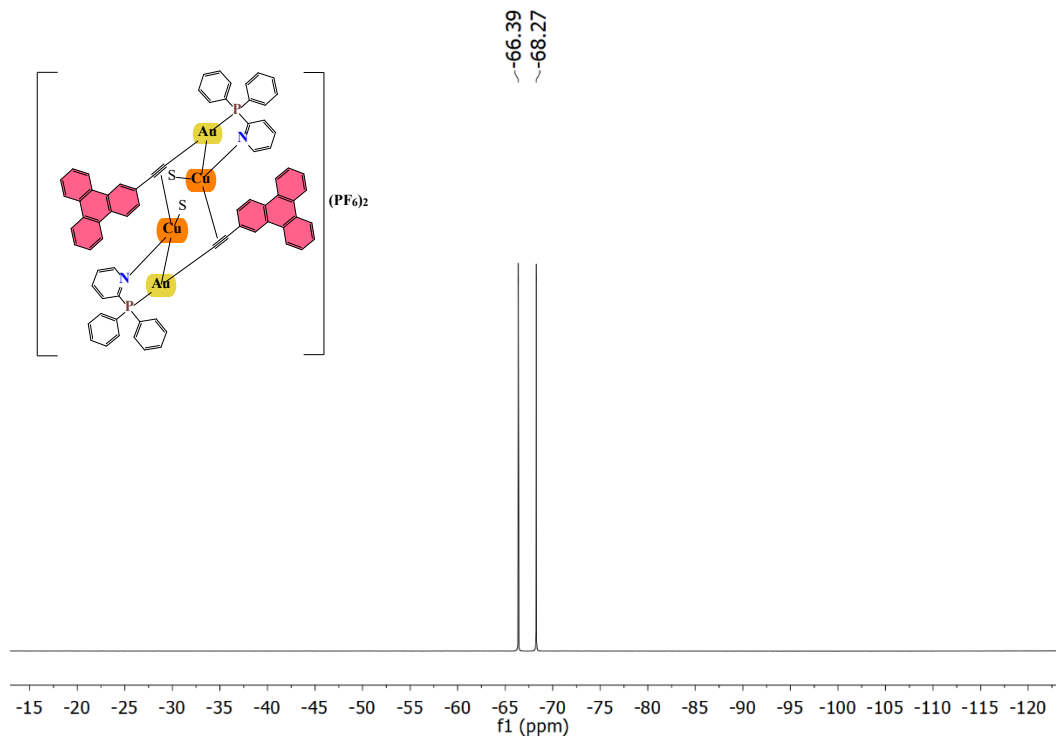

**Figure S6.**  $^{19}F$ -NMR spectra of **Cu1a** in  $CD_3COCD_3$ .

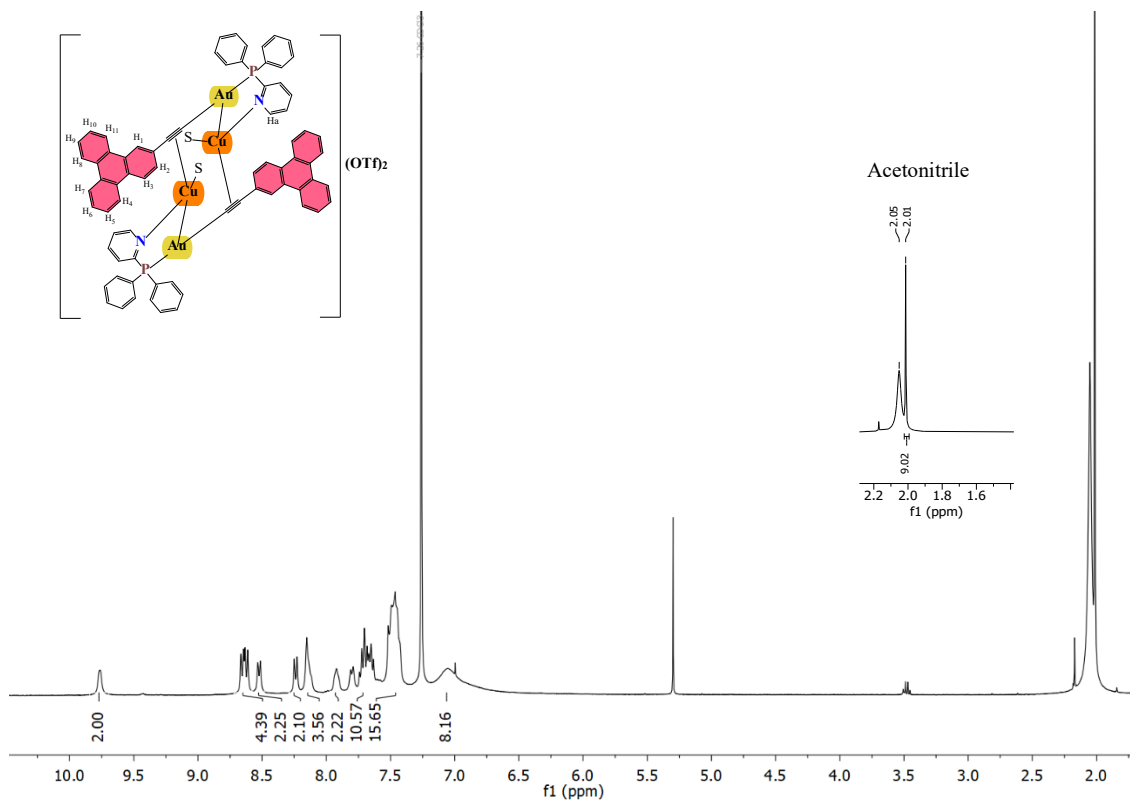

**Figure S7.**  $^1\text{H-NMR}$  spectra of **Cu1b** in  $\text{CDCl}_3$ .

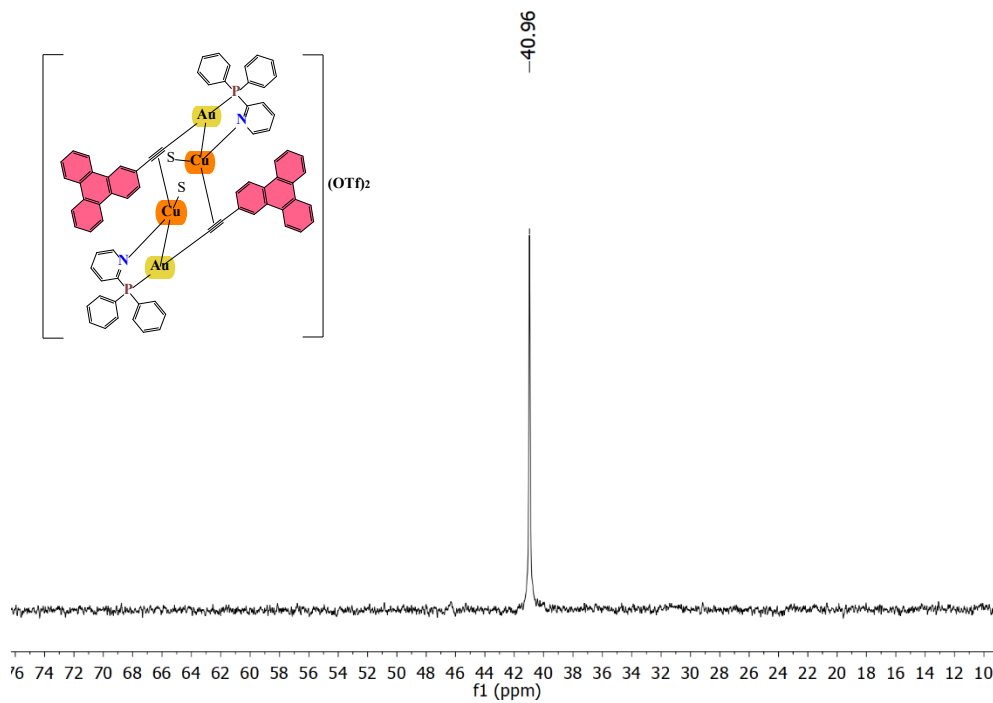

**Figure S8.**  $^{31}\text{P-NMR}$  spectra of **Cu1b** in  $\text{CDCl}_3$ .

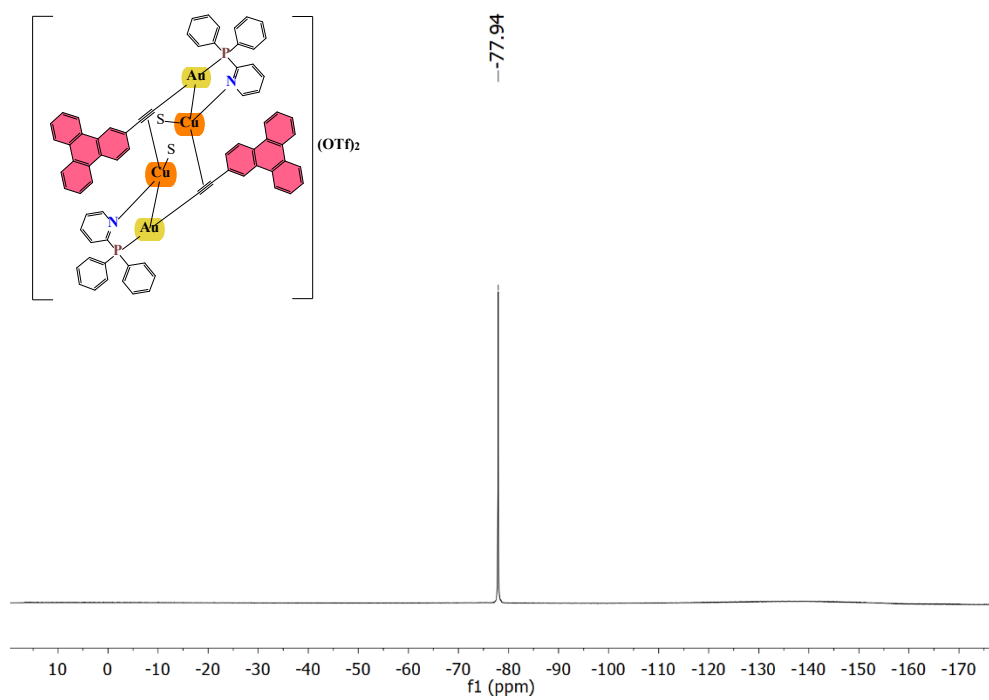

**Figure S9.**  $^{19}\text{F}$ -NMR spectra of **Cu1b** in  $\text{CDCl}_3$ .

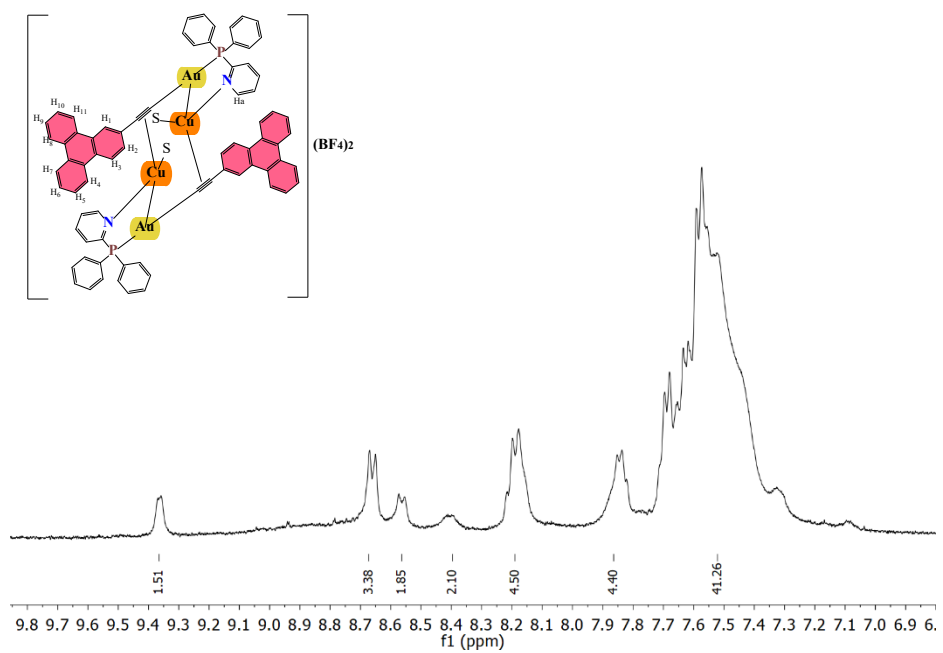

**Figure S10.**  $^1\text{H}$ -NMR spectra of **Cu1c** in  $\text{CD}_3\text{COCD}_3$ .

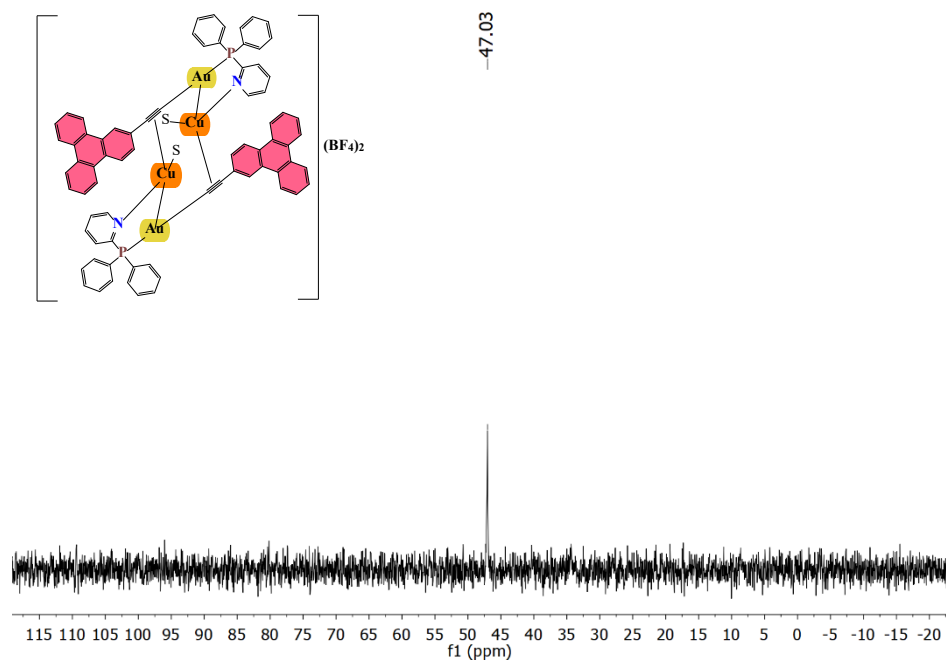

**Figure S11.**  $^{31}P$ -NMR spectra of **Cu1c** in  $CD_3COCD_3$ .

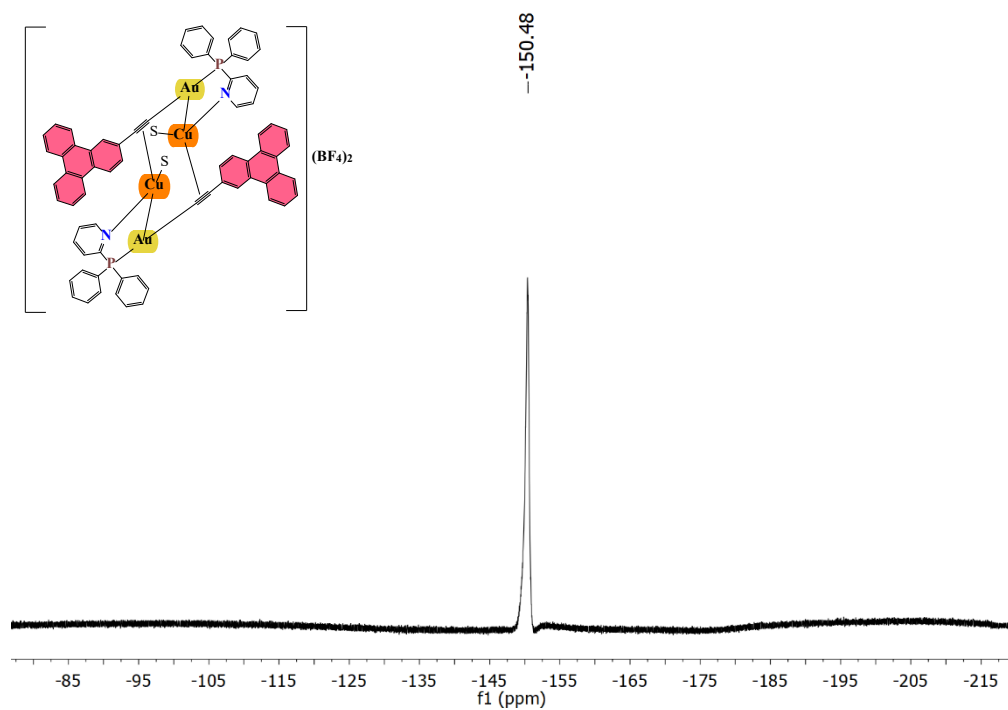

**Figure S12.**  $^{19}F$ -NMR spectra of **Cu1c** in  $CD_3COCD_3$ .

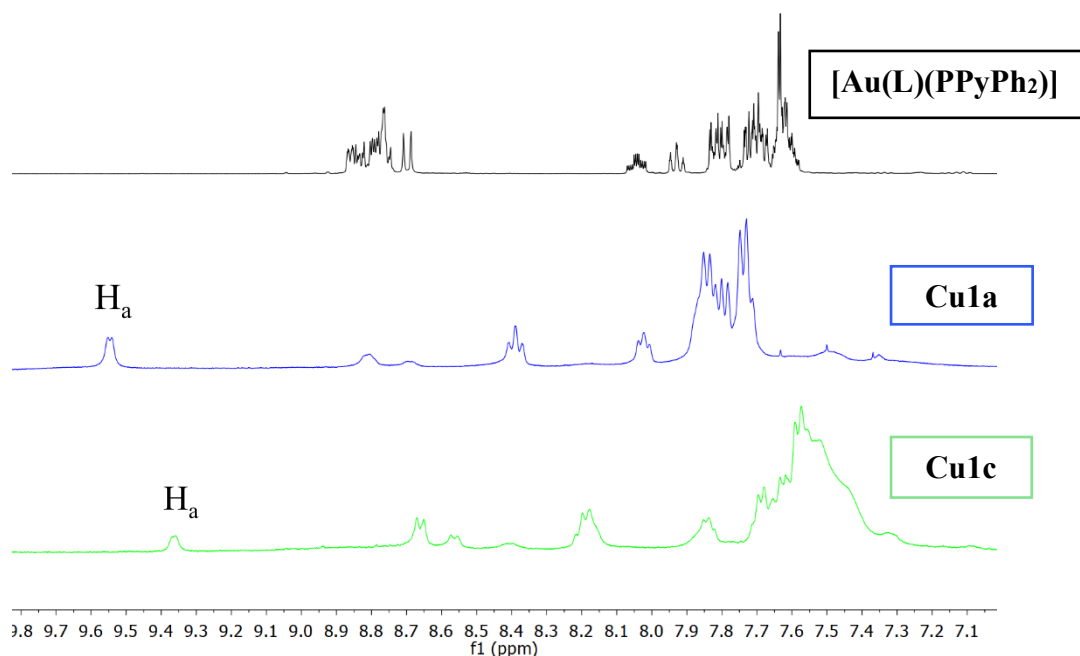

**Figure S13.**  $^1\text{H}$  NMR spectra comparison between  $[\text{Au}(\text{L})(\text{PPyPh}_2)]$  and **Cu1a**, **Cu1c** dimers in  $\text{CD}_3\text{COCD}_3$ .

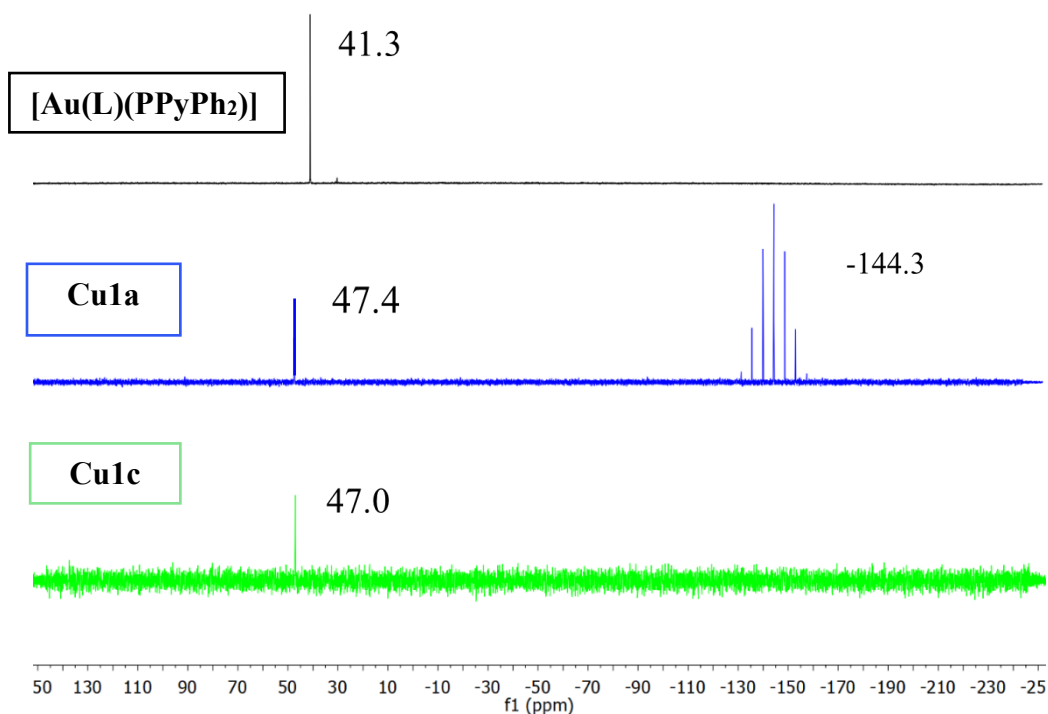

**Figure S14.**  $^{31}\text{P}\{^1\text{H}\}$  NMR comparison spectra between the precursor  $[\text{Au}(\text{L})(\text{PPyPh}_2)]$  and the heterometallics **Cu1a** and **Cu1c** in  $\text{CD}_3\text{COCD}_3$ .

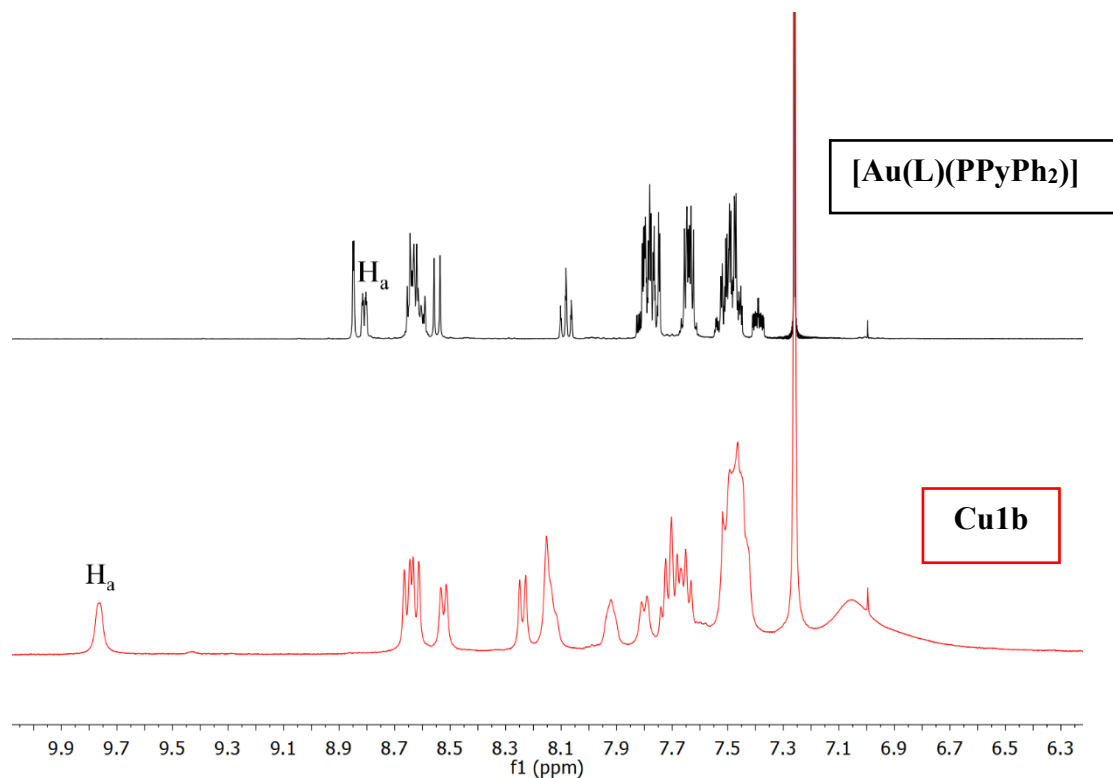

Figure S15. <sup>1</sup>H NMR spectra comparison between [Au(L)(PPyPh<sub>2</sub>)] and Cu1b dimers in CDCl<sub>3</sub>.

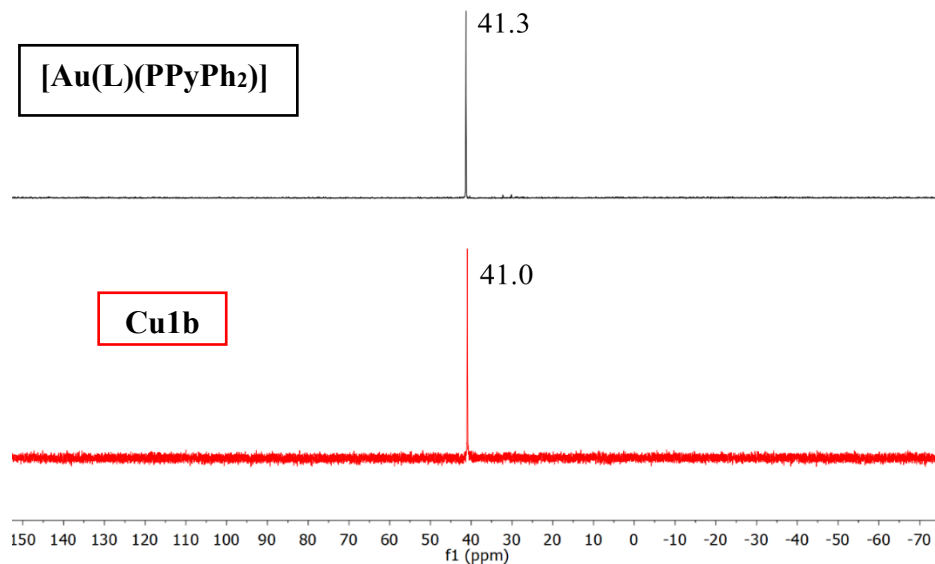

Figure S16. <sup>31</sup>P {<sup>1</sup>H} NMR comparison spectra between the precursor [Au(L)(PPyPh<sub>2</sub>)] and the heterometallic Cu1b in CDCl<sub>3</sub>.

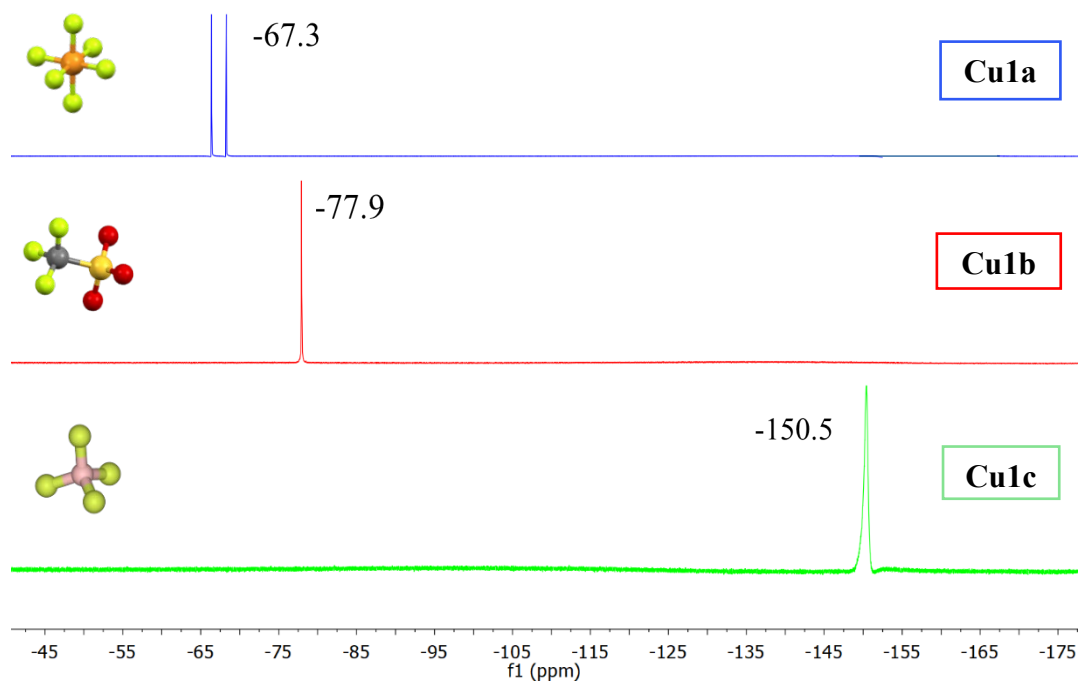

Figure S17.  $^{19}\text{F}$  NMR spectra of **3.1b** in  $\text{CDCl}_3$  and **3.1a-3.1c** in  $\text{CD}_3\text{COCD}_3$ .

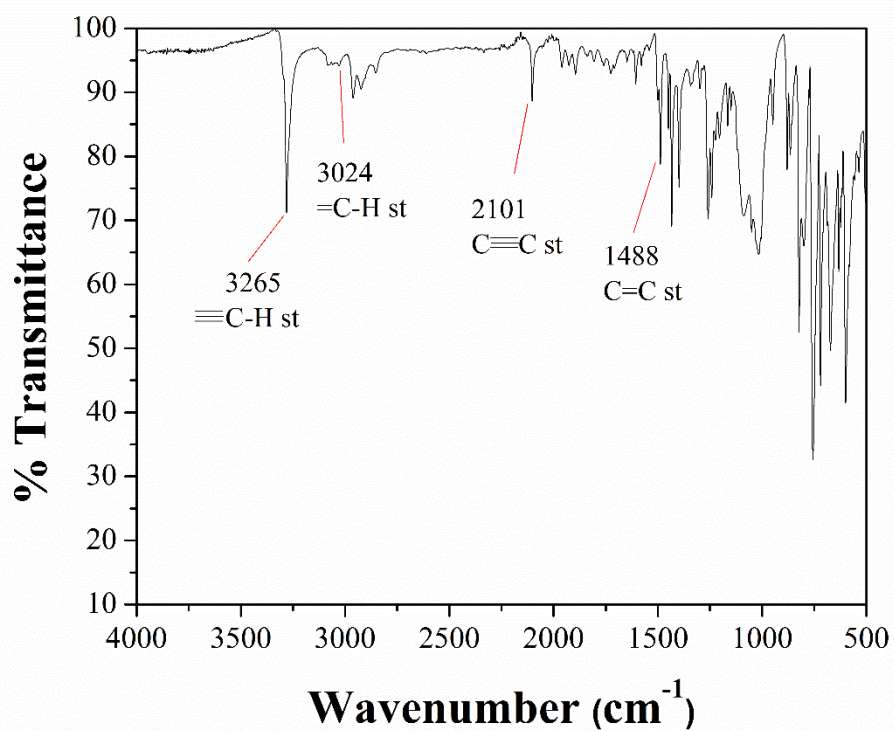

Figure S18. FT-IR Spectra of **L**.

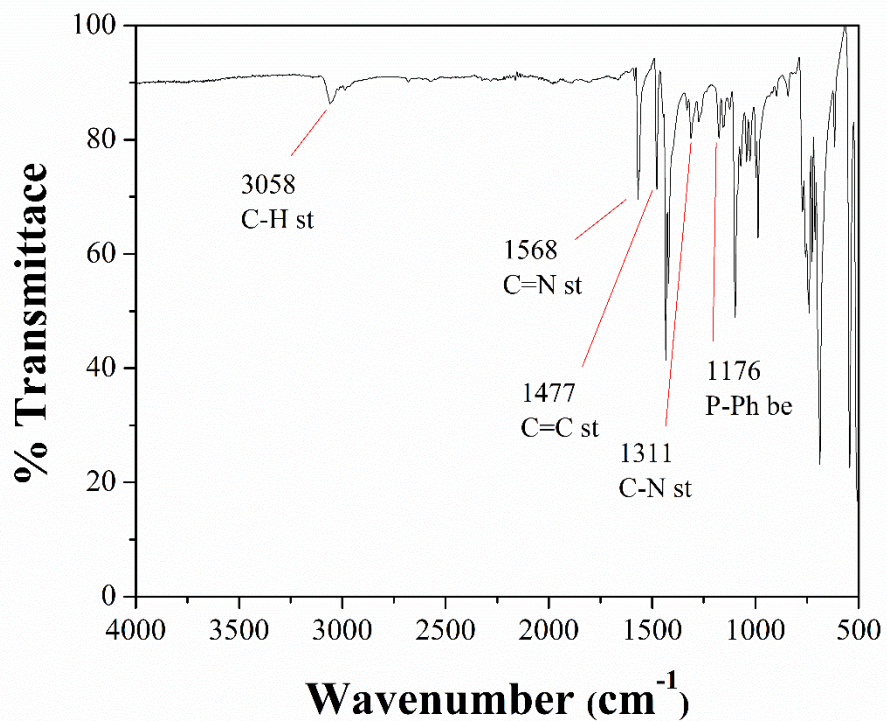

**Figure S19.** FT-IR Spectra of [Au(L)(PPyPh<sub>2</sub>)].

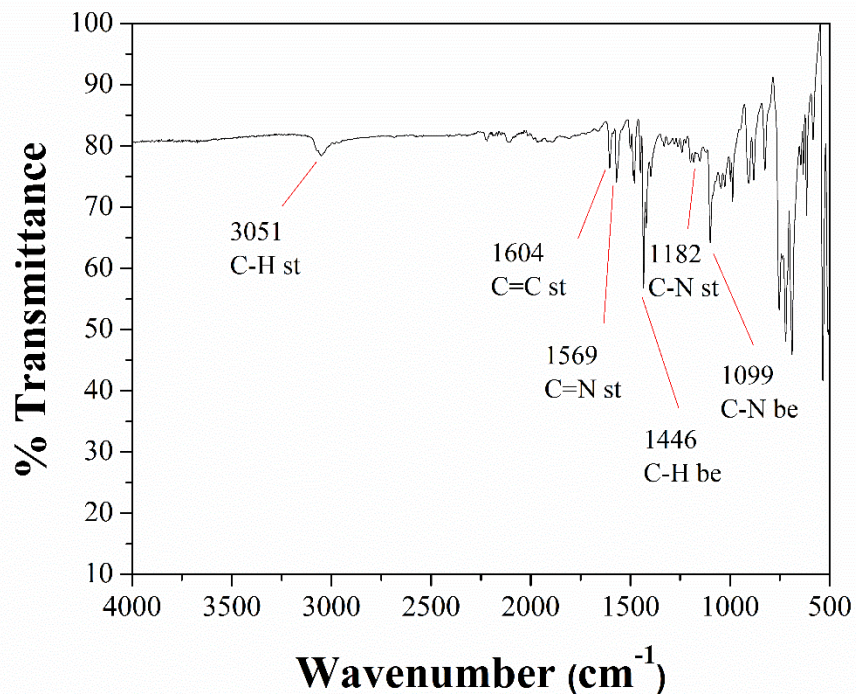

**Figure S20.** FT-IR Spectra of [Au(L)(PPyPh<sub>2</sub>)].

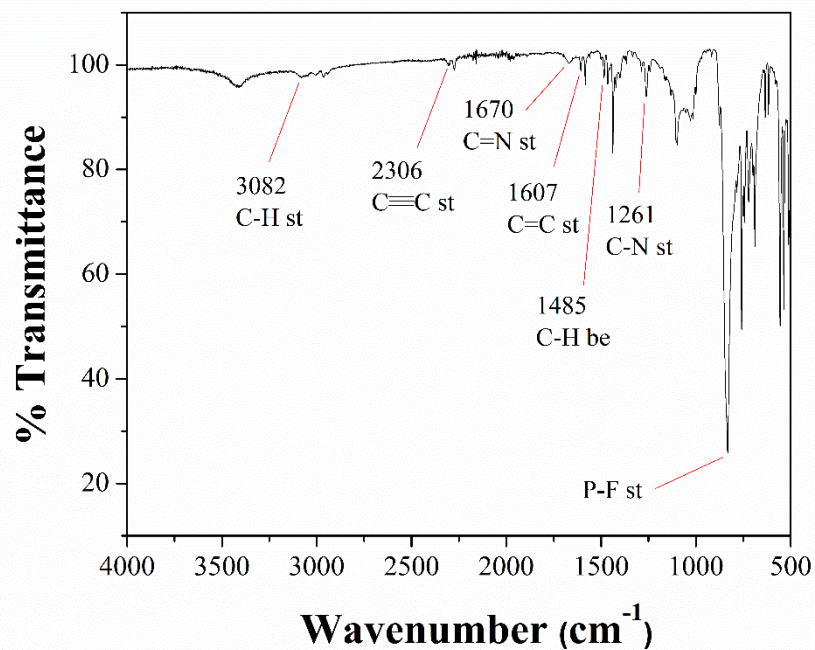

**Figure S21.** FT-IR Spectra of **Cu1a**.

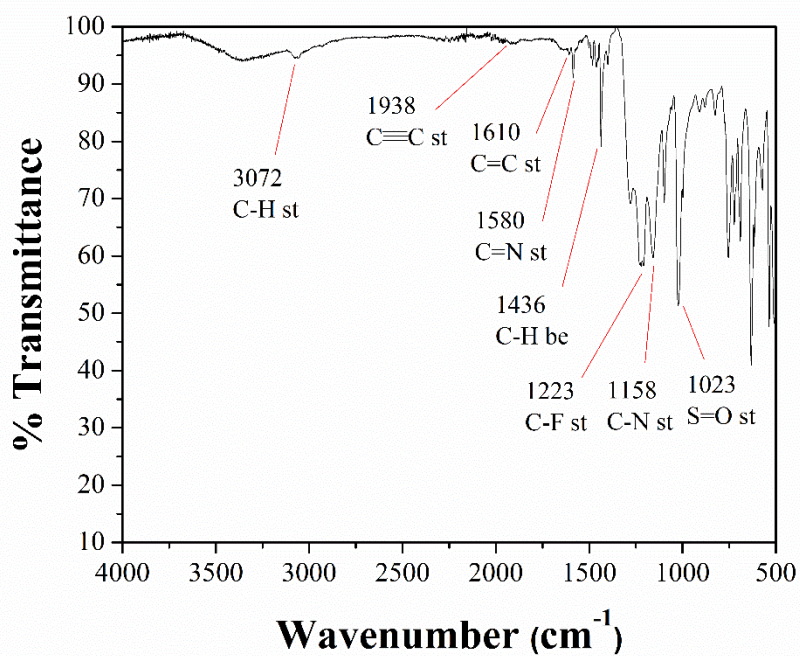

**Figure S22.** FT-IR Spectra of **Cu1b**.

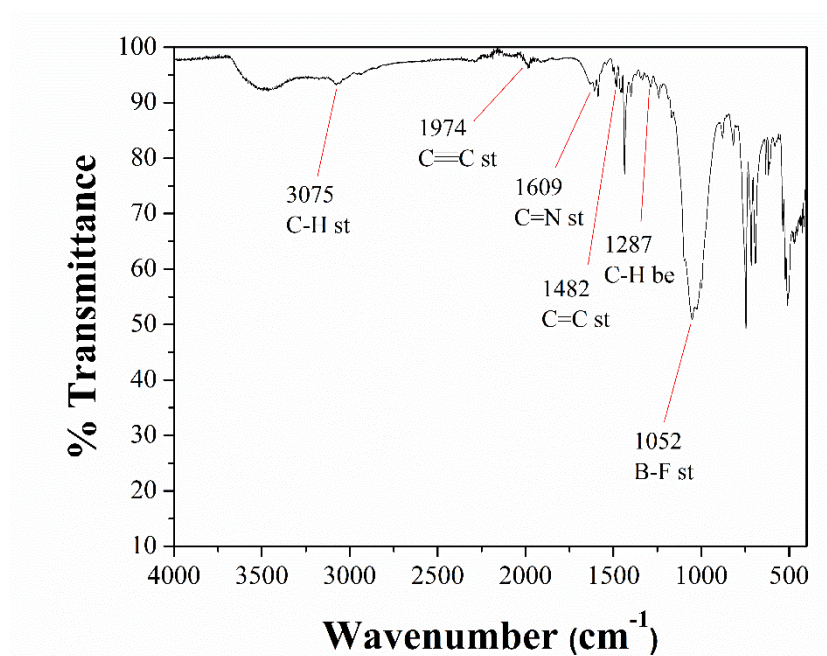

Figure S23. FT-IR Spectra of Cu1c.

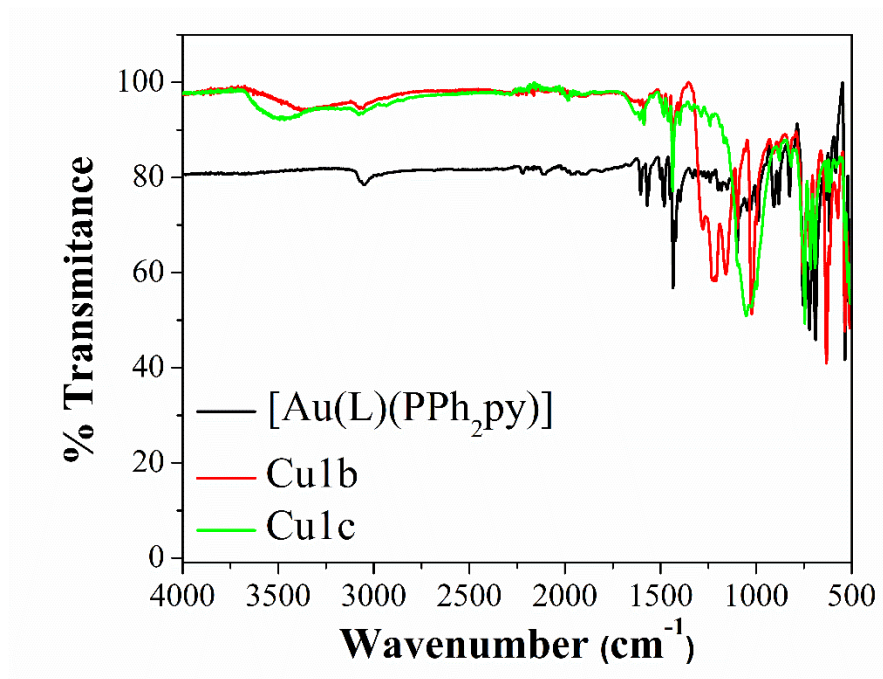

Figure S24. FT-IR comparison spectra between the precursor [Au(L)(PPyPh<sub>2</sub>)] and the heterometallic complexes Cu1b and Cu1c.

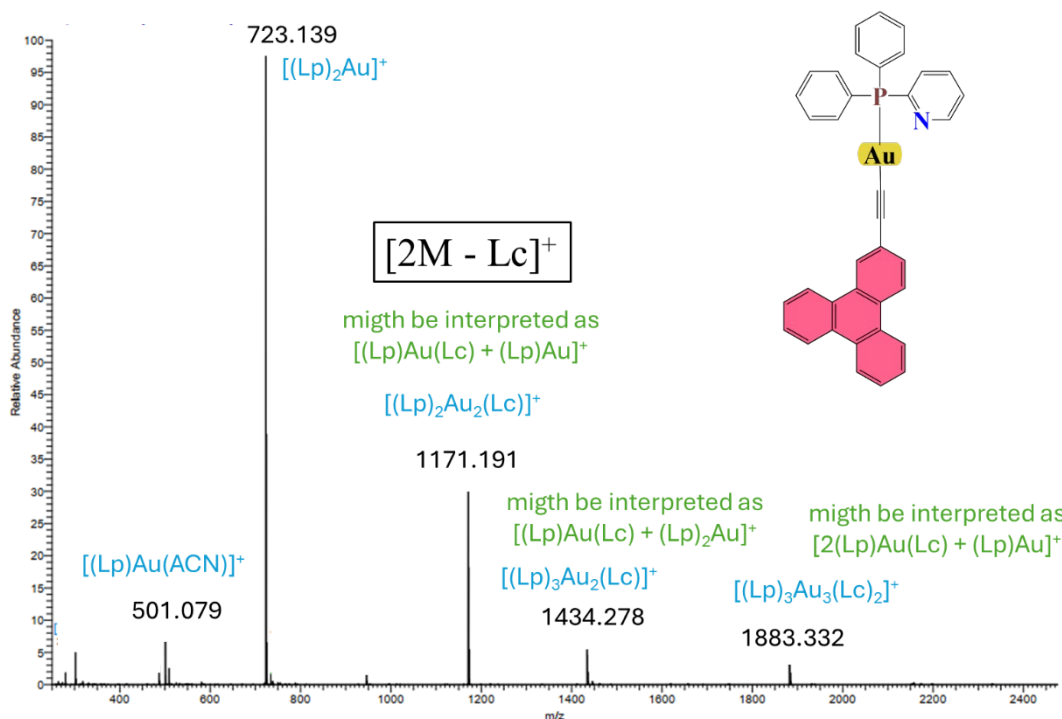

Figure S25. ESI(+)-mass spectra of  $[\text{Au}(\text{L})(\text{PPyPh}_2)]$ ,  $\text{Lp} = \text{PPyPh}_2$ ,  $\text{L} =$  chromophore ligand  $\text{C}_{20}\text{H}_{11}$ .

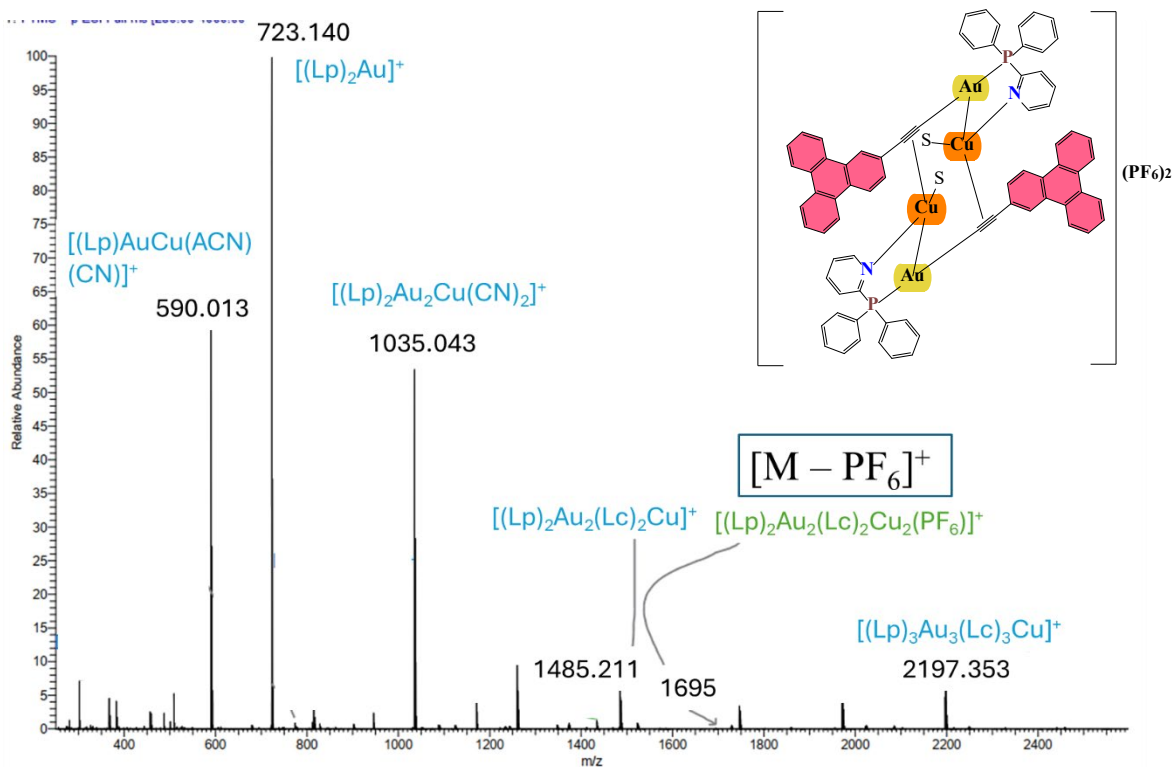

Figure S26. ESI(+)-mass spectra of **Cu1a**,  $\text{Lp} = \text{PPyPh}_2$ ,  $\text{L} =$  chromophore ligand  $\text{C}_{20}\text{H}_{11}$ .

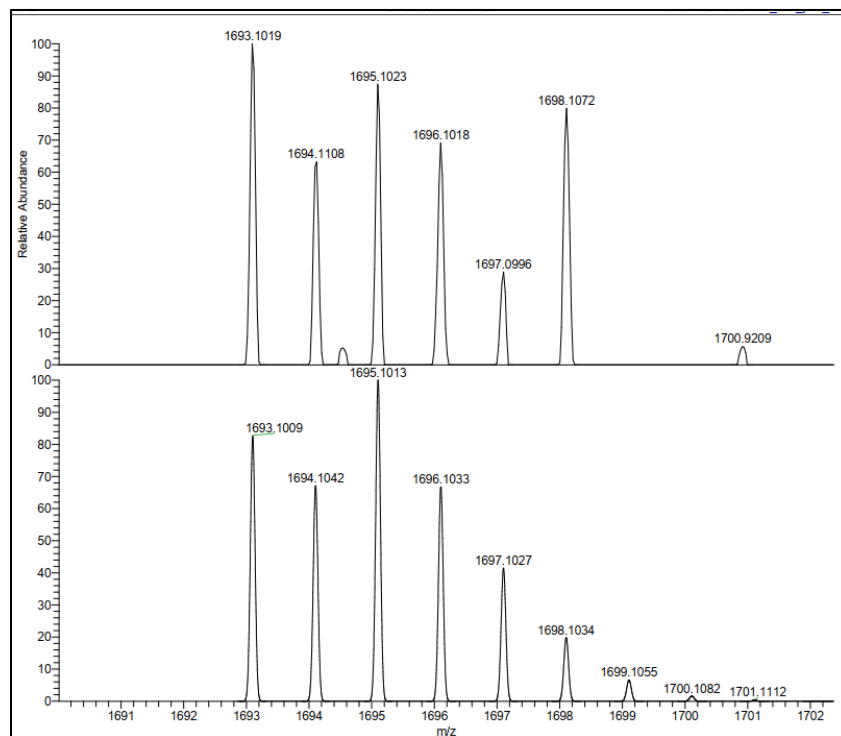

**Figure S27.** Above: Experimental isotopic distribution for the signal assigned to  $[\text{Cu1a} - \text{PF}_6]^+$ . below: Calculated isotopic mass distribution for  $[\text{Cu1a} - \text{PF}_6]^+$  according to its elemental composition  $\text{C}_{74}\text{H}_{50}\text{N}_2\text{P}_3\text{Cu}_2\text{Au}_2\text{F}_6$ .

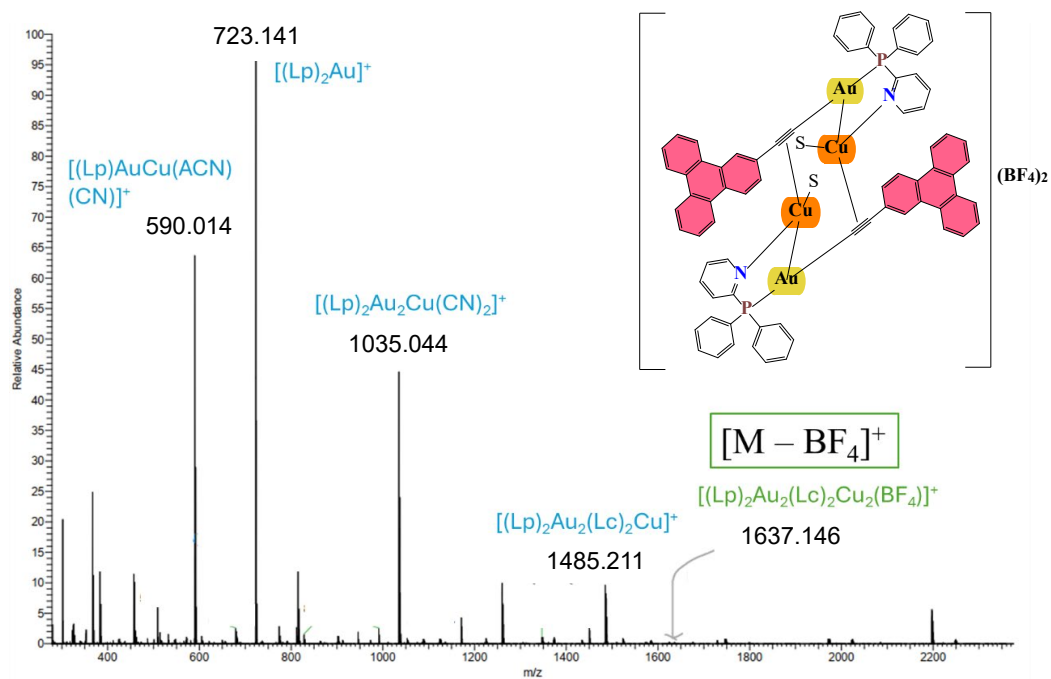

**Figure S28.** ESI(+) mass spectra of  $\text{Cu1c}$ ,  $\text{Lp} = \text{PPyPh}_2$ ,  $\text{L} = \text{chromophore ligand C}_{20}\text{H}_{11}$ .

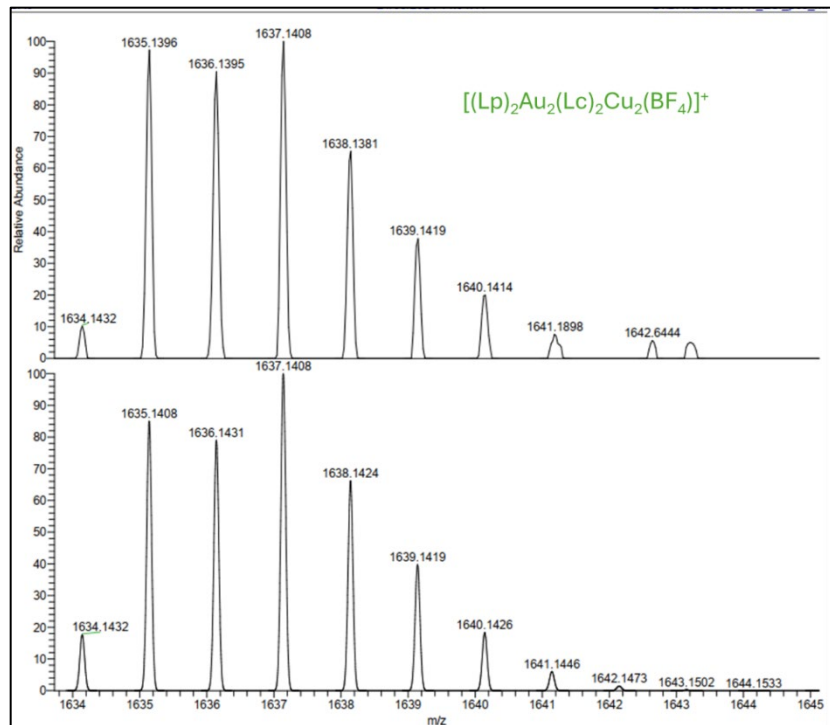

**Figure S29.** Above: Experimental isotopic distribution for the signal assigned to  $[\text{Cu1c} - \text{BF}_4]^+$ . below: Calculated isotopic mass distribution for  $[\text{Cu1c} - \text{BF}_4]^+$  according to its elemental composition  $\text{C}_{74}\text{H}_{50}\text{N}_2\text{P}_2\text{Cu}_2\text{Au}_2\text{BF}_4$ .

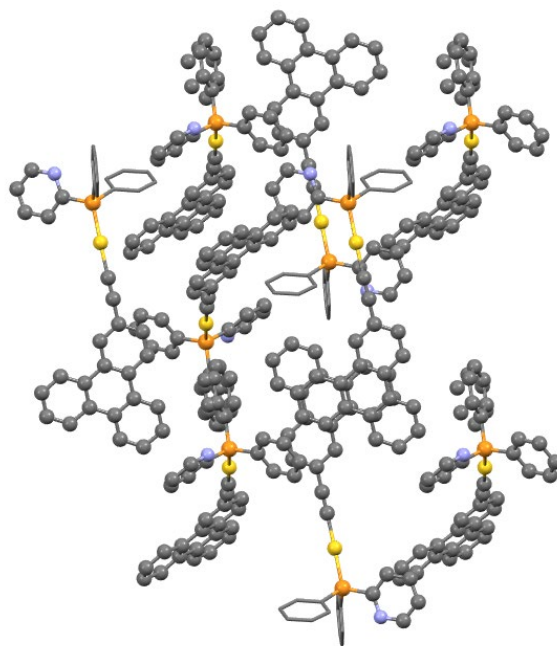

**Figure S30.** View of the molecular packing of  $[\text{Au}(\text{L})(\text{PPyPh}_2)]$  along the crystallographic  $a$ -axis.

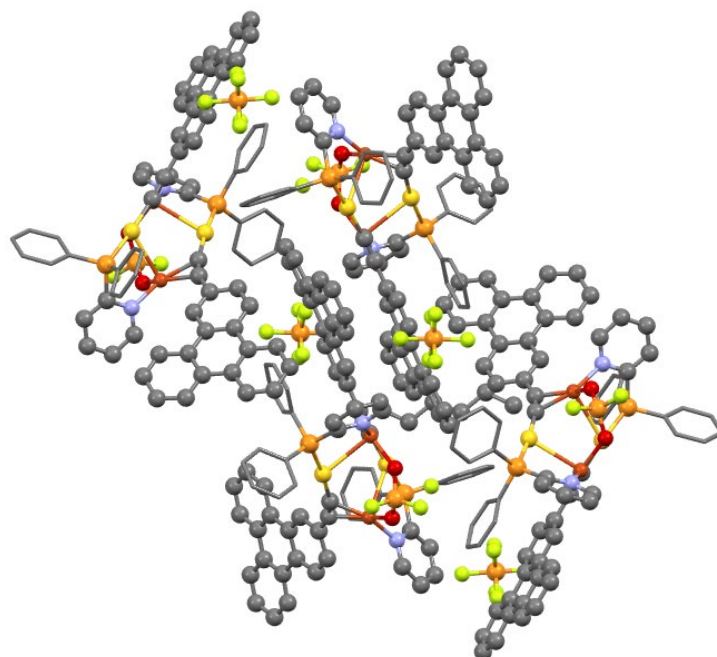

**Figure S31.** View of the molecular packing of cluster **Cu1a** along the crystallographic  $a^*$ -axis.

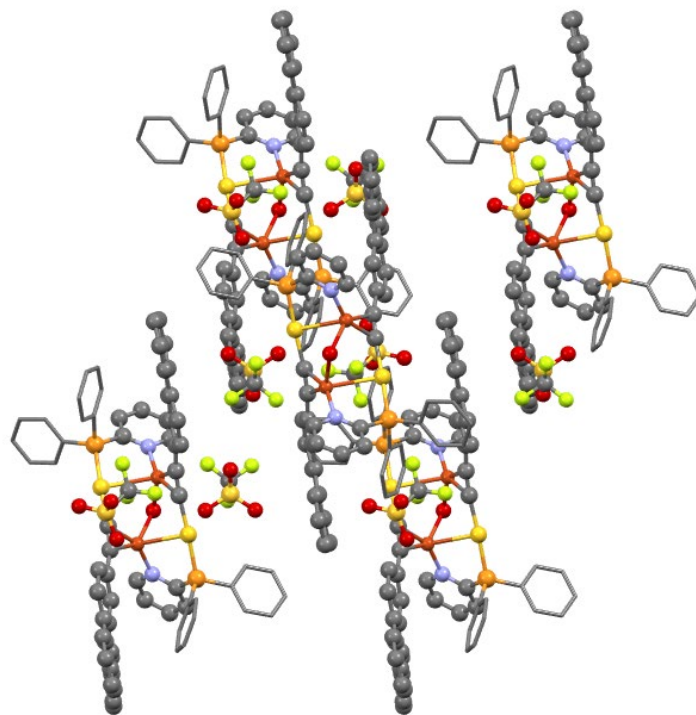

**Figure S32.** View of the molecular packing of cluster **Cu1b** along the crystallographic  $c$ -axis.

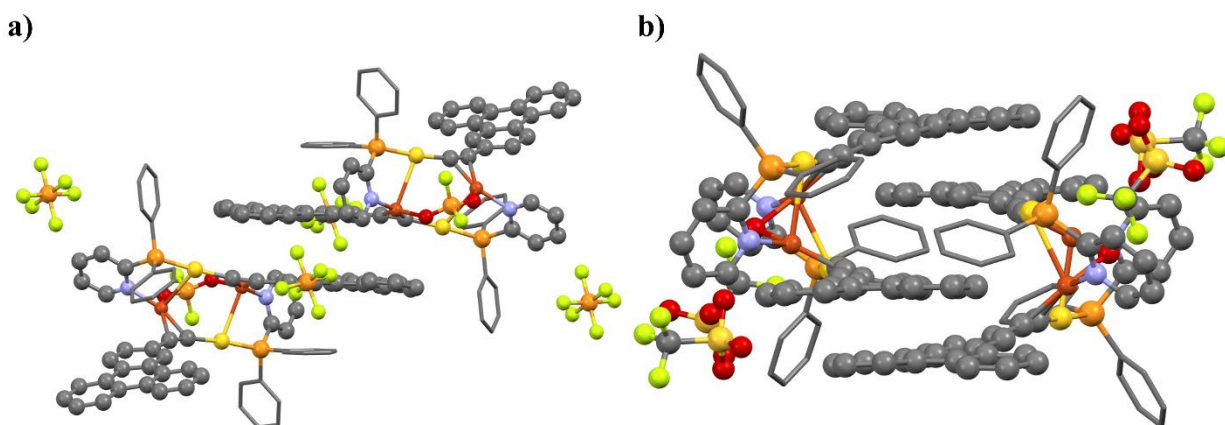

**Figure S33.** 3D crystal packing of complex **Cu1a** (a) **Cu1b** (b). Yellow: gold; bronze: copper; orange: phosphorus; blue: nitrogen; light green: fluorine. Hydrogen atoms have been omitted for clarity.

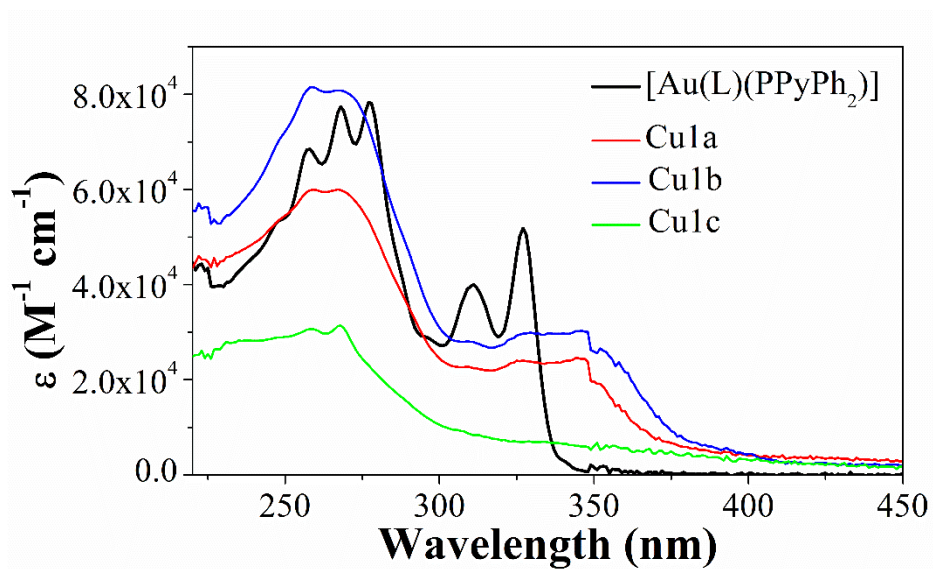

**Figure S34.** Absorption spectra of  $1.0 \times 10^{-5}$  M dichloromethane complexes solutions at 298 K.

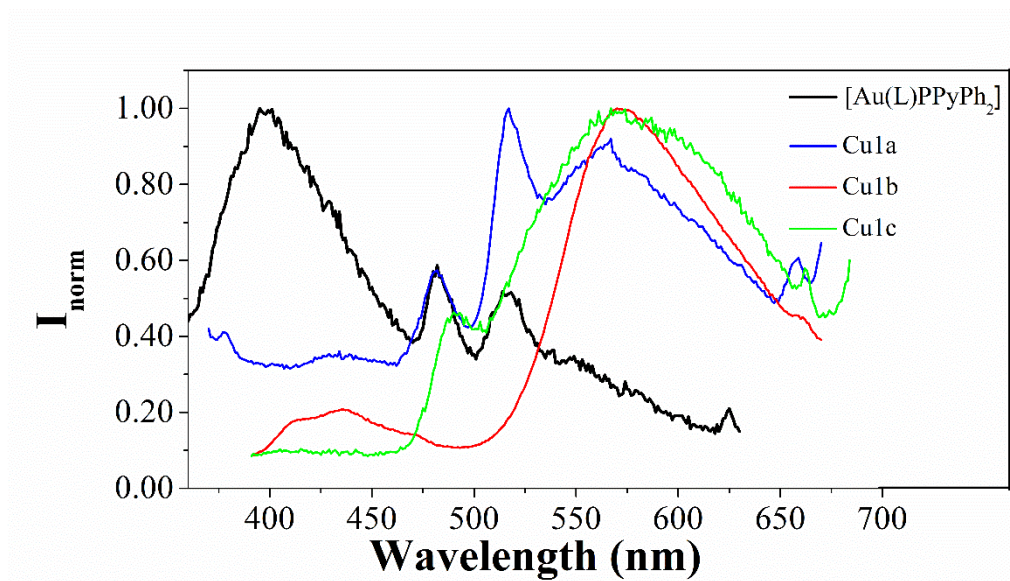

**Figure S35.** Normalized emission spectra of the complexes in the solid state at 298 K.  $\lambda_{exc}$  = 345 nm.

**Table S1.** Selected bond lengths (Å) and angles (°) for [Au(L)(PPyPh<sub>2</sub>)], Cu1a, and Cu1b.

| Complex                          | [Au(L)(PPyPh <sub>2</sub> )] | Cu1a                                                 | Cu1b                     |
|----------------------------------|------------------------------|------------------------------------------------------|--------------------------|
| <i>Au-P</i><br>(Å)               | 2.2688(6)<br>2.2784(7)       | 2.2846(11)<br>2.2661(11)<br>2.2738(14)<br>2.2667(13) | 2.2689(10)<br>2.2742(9)  |
| <i>Au-C</i><br>(Å)               | 1.998(3)<br>2.001(3)         | 2.024(4)<br>2.008(4)<br>2.009(6)<br>2.014(6)         | 2.010(4)<br>2.007(4)     |
| <i>C≡C</i><br>(Å)                | 1.203(4)<br>1.198(4)         | 1.221(7)<br>1.238(6)<br>1.240(8)<br>1.219(8)         | 1.229(6)<br>1.239(6)     |
| <i>Au-Cu</i><br>(Å)              | -                            | 2.8889(7)<br>2.8465(7)<br>2.8808(8)<br>2.8389(7)     | 2.8153(6)<br>2.7789(6)   |
| <i>Cu-N</i><br>(Å)               | -                            | 2.000(4)<br>2.008(4)<br>2.001(5)<br>2.026(4)         | 2.014(3)<br>1.984(3)     |
| <i>Au...Au</i><br>(Å)            | 5.2142(3)<br>8.2093(5)       | 4.2122(6)<br>4.2955(6)                               | 4.8628(4)                |
| <i>Cu...centroid(C≡C)</i><br>(Å) | -                            | 1.91<br>1.92<br>1.92<br>1.93                         | 1.95<br>1.94             |
| <i>(C≡)C-Au-P</i><br>(°)         | 176.50(8)<br>178.77(8)       | 173.43(13)<br>170.08(13)<br>173.92(15)<br>174.83(16) | 174.89(12)<br>175.23(11) |
| <i>(C≡)C-Cu-Au</i><br>(°)        | -                            | 87.20(13)<br>89.93(14)<br>85.88(17)<br>93.13(15)     | 108.20(11)<br>108.22(12) |
| <i>Au-Cu-N</i><br>(°)            | -                            | 95.97(12)<br>95.09(12)<br>94.33(12)<br>94.89(11)     | 90.32(9)<br>91.97(10)    |

**Table S2.** Crystal data and structure refinement for all structures reported herein.

| <b>Complex</b>                                                                | <b>[Au(L)(PPyPh2)]</b>               | <b>Cu1a</b>                                                                                                                                     | <b>Cu1b</b>                                                                                                                                |
|-------------------------------------------------------------------------------|--------------------------------------|-------------------------------------------------------------------------------------------------------------------------------------------------|--------------------------------------------------------------------------------------------------------------------------------------------|
| Formula                                                                       | C <sub>37</sub> H <sub>25</sub> AuNP | C <sub>315</sub> H <sub>244</sub> Au <sub>8</sub> Cl <sub>2</sub> Cu <sub>8</sub> F <sub>32</sub> N <sub>8</sub> O <sub>8</sub> P <sub>16</sub> | C <sub>76</sub> H <sub>52</sub> Au <sub>2</sub> Cu <sub>2</sub> F <sub>6</sub> N <sub>2</sub> O <sub>7</sub> P <sub>2</sub> S <sub>2</sub> |
| Formula Weight (g mol <sup>-1</sup> )                                         | 711.51                               | 7527.64                                                                                                                                         | 1866.27                                                                                                                                    |
| Colour & Habit                                                                | Colourless needle                    | Colourless plate                                                                                                                                | Colourless block                                                                                                                           |
| Crystal Dimensions (mm)                                                       | 0.06 × 0.07 × 0.22                   | 0.01 × 0.07 × 0.14                                                                                                                              | 0.04 × 0.12 × 0.18                                                                                                                         |
| Crystal System                                                                | Triclinic                            | Triclinic                                                                                                                                       | Triclinic                                                                                                                                  |
| Space Group                                                                   | <i>P</i> $\bar{1}$                   | <i>P</i> $\bar{1}$                                                                                                                              | <i>P</i> $\bar{1}$                                                                                                                         |
| <i>a</i> (Å)                                                                  | 11.38880(10)                         | 18.8859(4)                                                                                                                                      | 14.0784(3)                                                                                                                                 |
| <i>b</i> (Å)                                                                  | 14.11400(10)                         | 19.3043(3)                                                                                                                                      | 15.9050(3)                                                                                                                                 |
| <i>c</i> (Å)                                                                  | 18.04900(10)                         | 22.4193(4)                                                                                                                                      | 16.6057(2)                                                                                                                                 |
| $\alpha$ (°)                                                                  | 87.6190(10)                          | 89.9310(10)                                                                                                                                     | 95.5170(10)                                                                                                                                |
| $\beta$ (°)                                                                   | 88.5930(10)                          | 69.060(2)                                                                                                                                       | 91.2950(10)                                                                                                                                |
| $\gamma$ (°)                                                                  | 88.9210(10)                          | 66.344(2)                                                                                                                                       | 112.378(2)                                                                                                                                 |
| <i>V</i> (Å <sup>3</sup> )                                                    | 2897.39(4)                           | 6895.1(3)                                                                                                                                       | 3415.26(12)                                                                                                                                |
| <i>Z</i>                                                                      | 4                                    | 1                                                                                                                                               | 2                                                                                                                                          |
| $\rho_{\text{calc}}$ (g cm <sup>-3</sup> )                                    | 1.631                                | 1.813                                                                                                                                           | 1.815                                                                                                                                      |
| <i>F</i> (000)                                                                | 1392                                 | 3680                                                                                                                                            | 1820                                                                                                                                       |
| $\mu$ (mm <sup>-1</sup> )                                                     | 10.26                                | 10.18                                                                                                                                           | 10.24                                                                                                                                      |
| Temperature (K)                                                               | 120.0(1)                             | 120.0(1)                                                                                                                                        | 120.0(1)                                                                                                                                   |
| $\theta_{\text{max}}$ [°]                                                     | 74.5                                 | 74.5                                                                                                                                            | 74.5                                                                                                                                       |
| Total Reflections                                                             | 59996                                | 142176                                                                                                                                          | 81902                                                                                                                                      |
| Independent Reflections                                                       | 11833                                | 28119                                                                                                                                           | 13937                                                                                                                                      |
| Reflections ( <i>I</i> <sub>o</sub> > 2σ[ <i>I</i> <sub>o</sub> ])            | 11091                                | 24698                                                                                                                                           | 12360                                                                                                                                      |
| <i>R</i> <sub>int</sub>                                                       | 0.037                                | 0.045                                                                                                                                           | 0.062                                                                                                                                      |
| Parameters                                                                    | 764                                  | 1817                                                                                                                                            | 898                                                                                                                                        |
| Restraints                                                                    | 72                                   | 92                                                                                                                                              | 9                                                                                                                                          |
| GooF ( <i>F</i> <sup>2</sup> )                                                | 1.04                                 | 1.06                                                                                                                                            | 1.09                                                                                                                                       |
| <i>R</i> <sub>1</sub> ( <i>I</i> <sub>o</sub> > 2σ[ <i>I</i> <sub>o</sub> ])  | 0.0232                               | 0.0391                                                                                                                                          | 0.0317                                                                                                                                     |
| <i>R</i> <sub>1</sub> (all reflections)                                       | 0.0249                               | 0.0468                                                                                                                                          | 0.0366                                                                                                                                     |
| <i>wR</i> <sub>2</sub> ( <i>I</i> <sub>o</sub> > 2σ[ <i>I</i> <sub>o</sub> ]) | 0.0604                               | 0.0926                                                                                                                                          | 0.0821                                                                                                                                     |
| <i>wR</i> <sub>2</sub> (all reflections)                                      | 0.0614                               | 0.0960                                                                                                                                          | 0.0850                                                                                                                                     |
| Largest Peak (eÅ <sup>-3</sup> )                                              | 0.856                                | 1.523                                                                                                                                           | 1.135                                                                                                                                      |
| Largest Hole (eÅ <sup>-3</sup> )                                              | -1.703                               | -1.500                                                                                                                                          | -1.897                                                                                                                                     |
| CCDC Number                                                                   | 2481587                              | 2520370                                                                                                                                         | 2520371                                                                                                                                    |

**Table S3.** Luminescence quantum yields (%) recorded for all the compounds in dichloromethane solution.

| Complex                      | Air-equilibrated samples |                      | N <sub>2</sub> -saturated samples |                      |
|------------------------------|--------------------------|----------------------|-----------------------------------|----------------------|
|                              | $\Phi_{\text{Fl}}$       | $\Phi_{\text{Phos}}$ | $\Phi_{\text{Fl}}$                | $\Phi_{\text{Phos}}$ |
| [Au(L)(PPyPh <sub>2</sub> )] | 0.05                     | -                    | 0.01                              | 0.01                 |
| <b>Cu1a</b>                  | 0.01                     | < 0.01               | 0.01                              | < 0.01               |
| <b>Cu1b</b>                  | < 0.01                   | < 0.01               | 0.01                              | 0.02                 |

**Table S4.** Luminescence lifetimes in dichloromethane solution.

| Complex                      | Air-equilibrated samples |                                        | N <sub>2</sub> -saturated samples |                                        |
|------------------------------|--------------------------|----------------------------------------|-----------------------------------|----------------------------------------|
|                              | $\tau_{\text{Fl}}$ (ns)  | $\tau_{\text{Phos}}$ ( $\mu\text{s}$ ) | $\tau_{\text{Fl}}$ (ns)           | $\tau_{\text{Phos}}$ ( $\mu\text{s}$ ) |
| [Au(L)(PPyPh <sub>2</sub> )] | 7                        | -                                      | 14                                | 84                                     |
| <b>Cu1a</b>                  | 10                       | 0.3                                    | 20                                | 45                                     |
| <b>Cu1b</b>                  | 7                        | 0.5                                    | 10                                | 39                                     |

**Table S5.** Emission data of the complexes in solid state at 298 K.

| Complex                      | Fluorescence emission                           | Phosphorescence emission                        |
|------------------------------|-------------------------------------------------|-------------------------------------------------|
|                              | air-equilibrated $\lambda_{\text{max}}$<br>(nm) | air-equilibrated<br>$\lambda_{\text{max}}$ (nm) |
| [Au(L)(PPyPh <sub>2</sub> )] | 399                                             | 518                                             |
| <b>Cu1a</b>                  | 431                                             | 565                                             |
| <b>Cu1b</b>                  | 436                                             | 572                                             |
| <b>Cu1c</b>                  | 426                                             | 573                                             |

**Table S6.** Luminescence quantum yields recorded for all the compounds in solid state at 298 K.

| Complex                      | Air-equilibrated samples |                      |
|------------------------------|--------------------------|----------------------|
|                              | $\Phi_{\text{Fl}}$       | $\Phi_{\text{Phos}}$ |
| [Au(L)(PPyPh <sub>2</sub> )] | 0.01                     | -                    |
| <b>Cu1a</b>                  | -                        | < 0.01               |
| <b>Cu1b</b>                  | -                        | < 0.01               |
| <b>Cu1c</b>                  | -                        | 0.01                 |

**Table S7.** Emission data of the complexes in organic matrixes.

| PMMA                         |                                                   |                                                      |                                                      |
|------------------------------|---------------------------------------------------|------------------------------------------------------|------------------------------------------------------|
| Complex                      | Air-equilibrated samples                          |                                                      | N <sub>2</sub> -saturated samples                    |
|                              | Fluorescence emission $\lambda_{\text{max}}$ (nm) | Phosphorescence emission $\lambda_{\text{max}}$ (nm) | Phosphorescence emission $\lambda_{\text{max}}$ (nm) |
| [Au(L)(PPyPh <sub>2</sub> )] | -                                                 | 498                                                  | 498                                                  |
| <b>Cu1a</b>                  | -                                                 | 501                                                  | 501                                                  |
| <b>Cu1b</b>                  | -                                                 | 500                                                  | 500                                                  |
| <b>Cu1c</b>                  | 389                                               | 500                                                  | 500                                                  |
| PS                           |                                                   |                                                      |                                                      |
| Complex                      | Air-equilibrated samples                          |                                                      | N <sub>2</sub> -saturated samples                    |
|                              | Fluorescence emission $\lambda_{\text{max}}$ (nm) | Phosphorescence emission $\lambda_{\text{max}}$ (nm) | Phosphorescence emission $\lambda_{\text{max}}$ (nm) |
| [Au(L)(PPyPh <sub>2</sub> )] | 387                                               | 500                                                  | 501                                                  |
| <b>Cu1a</b>                  | 396                                               | 506                                                  | 506                                                  |
| <b>Cu1b</b>                  | 392                                               | 504                                                  | 505                                                  |
| <b>Cu1c</b>                  | 394                                               | 506                                                  | 505                                                  |

**Table S8.** Luminescence quantum yields recorded for all the compounds in organic matrixes.

| <b>PMMA</b>                  |                                 |                      |                                        |
|------------------------------|---------------------------------|----------------------|----------------------------------------|
| <b>Complex</b>               | <b>Air-equilibrated samples</b> |                      | <b>N<sub>2</sub>-saturated samples</b> |
|                              | $\Phi_{\text{Fl}}$              | $\Phi_{\text{Phos}}$ | $\Phi_{\text{Phos}}$                   |
| [Au(L)(PPyPh <sub>2</sub> )] | -                               | 0.04                 | 0.28                                   |
| <b>Cu1a</b>                  | -                               | 0.13                 | 0.38                                   |
| <b>Cu1b</b>                  | -                               | 0.08                 | 0.30                                   |
| <b>Cu1c</b>                  | <0.01                           | 0.11                 | 0.38                                   |
| <b>PS</b>                    |                                 |                      |                                        |
| <b>Complex</b>               | <b>Air-equilibrated samples</b> |                      | <b>N<sub>2</sub>-saturated samples</b> |
|                              | $\Phi_{\text{Fl}}$              | $\Phi_{\text{Phos}}$ | $\Phi_{\text{Phos}}$                   |
| [Au(L)(PPyPh <sub>2</sub> )] | <0.01                           | 0.02                 | 0.12                                   |
| <b>Cu1a</b>                  | <0.01                           | 0.05                 | 0.19                                   |
| <b>Cu1b</b>                  | <0.01                           | 0.05                 | 0.17                                   |
| <b>Cu1c</b>                  | <0.01                           | 0.05                 | 0.23                                   |

**Table S9.** Luminescence lifetimes for all the compounds in organic matrixes.

| <b>PMMA</b>                  |                                 |                                        |                                        |
|------------------------------|---------------------------------|----------------------------------------|----------------------------------------|
| <b>Complex</b>               | <b>Air-equilibrated samples</b> |                                        | <b>N<sub>2</sub>-saturated samples</b> |
|                              | $\tau_{\text{Fl}}$ (ns)         | $\tau_{\text{Phos}}$ ( $\mu\text{s}$ ) | $\tau_{\text{Phos}}$ ( $\mu\text{s}$ ) |
| [Au(L)(PPyPh <sub>2</sub> )] | -                               | 88                                     | 635                                    |
| <b>Cu1a</b>                  | -                               | 38                                     | 135                                    |
| <b>Cu1b</b>                  | -                               | 86                                     | 194                                    |
| <b>Cu1c</b>                  | 16                              | 53                                     | 308                                    |
| <b>PS</b>                    |                                 |                                        |                                        |
| <b>Complex</b>               | <b>Air-equilibrated samples</b> |                                        | <b>N<sub>2</sub>-saturated samples</b> |
|                              | $\tau_{\text{Fl}}$ (ns)         | $\tau_{\text{Phos}}$ ( $\mu\text{s}$ ) | $\tau_{\text{Phos}}$ ( $\mu\text{s}$ ) |
| [Au(L)(PPyPh <sub>2</sub> )] | 21                              | 124                                    | 991                                    |
| <b>Cu1a</b>                  | 27                              | 31                                     | 198                                    |
| <b>Cu1b</b>                  | 23                              | 40                                     | 170                                    |
| <b>Cu1c</b>                  | 15                              | 40                                     | 224                                    |
